# Supplementary material for: Photoinduced supramolecular chirality in side-chain liquid crystalline azopolymers
Source: Royal Society of Chemistry journal article supplement (doi:10.1039/b518269g), 2006-01-01
Supplement: b518269g.pdf [file b518269g.pdf]

Supplementary material (ESI) for Journal of Materials Chemistry

This journal is © The Royal Society of Chemistry 2006

## **Photoinduced supramolecular chirality in side-chain liquid crystalline azopolymers**

**Rosa M. Tejedor, Marta Millaruelo, Luis Oriol,\* José Luis Serrano, Rafael Alcalá, Francisco J. Rodríguez and Belén Villacampa**

Electronic Supplementary Information (ESI)

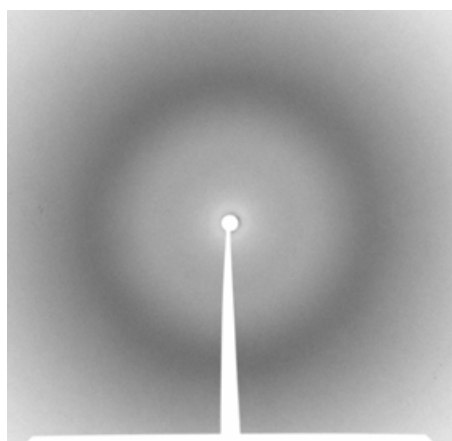

**Fig. S1.** X-ray diffraction pattern of the mesophase of **PC2**.

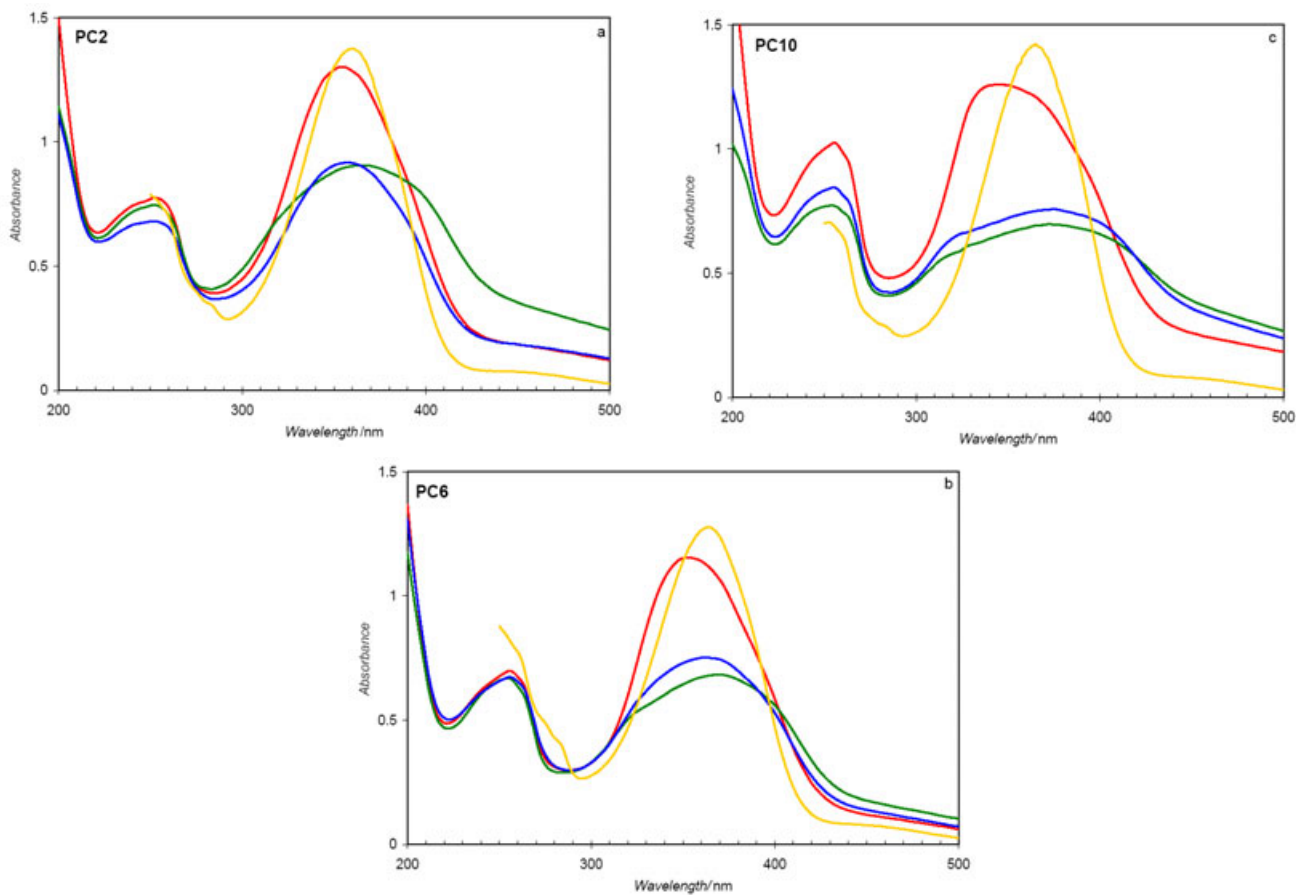

**Fig. S2** UV-vis spectra of (a) **PC2**; (b) **PC6** and (c) **PC10** in THF solution (yellow), as-prepared cast film (red), annealed film (green) and irradiated film with *r*-CPL from 488 nm line of Ar<sup>+</sup> laser (20 mW/cm<sup>2</sup>) for 30 min (blue).

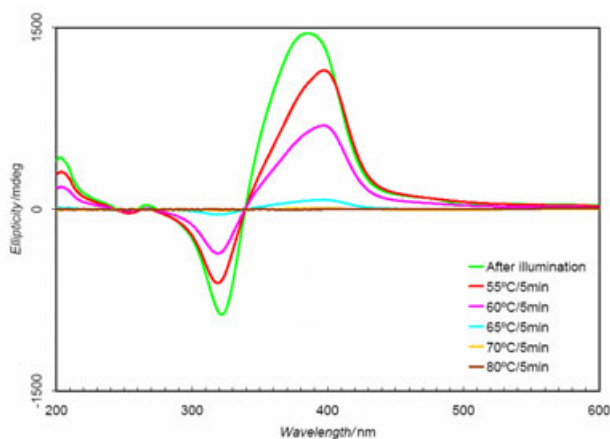

**Fig. S3** CD spectra of irradiated **PC6** with *r*-CPL from 488 nm line of Ar<sup>+</sup> laser (20 mW/cm<sup>2</sup>) for 30 min after annealing for 5 min at the indicated temperatures.

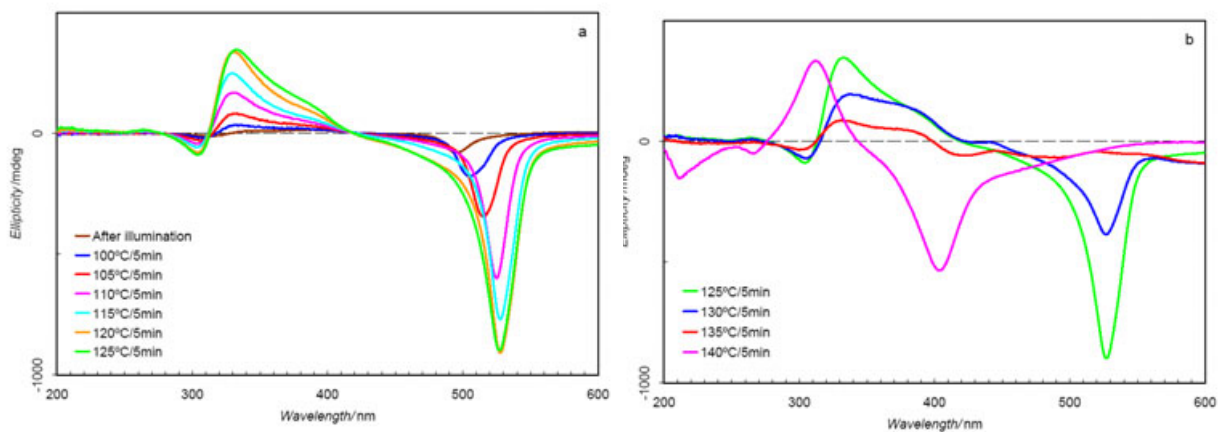

**Fig. S4.** CD spectra of irradiated **PC2** with *l*-CPL from 488 nm line of Ar<sup>+</sup> laser (20 mW/cm<sup>2</sup>) for 30 min after annealing for 5 min at the indicated temperatures: (a) 100 to 125°C (b) 125 to 140°C.

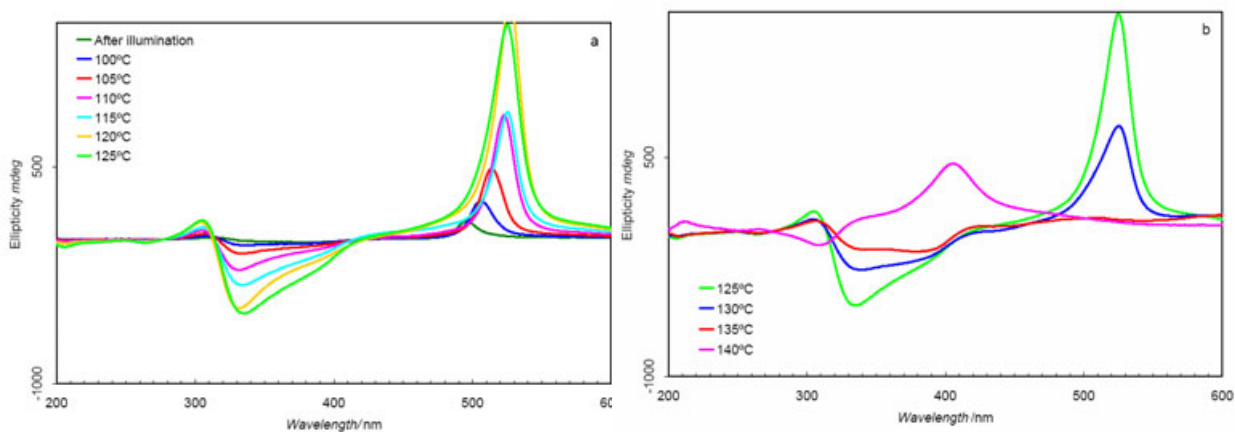

**Fig. S5.** CD spectra of irradiated **PC2** with *l*-CPL from 488 nm line of Ar<sup>+</sup> laser (20 mW/cm<sup>2</sup>) for 30 min after annealing for 5 min at the indicated temperatures: (a) 100 to 125°C (b) 125 to 140°C.
